# Supplementary material for: Barriers and enablers for deprescribing among older, multimorbid patients with polypharmacy: an explorative study from Switzerland
Source: PubMed Central journal article supplement (PMC6518702; doi:10.1186/s12875-019-0953-4), 2019-05-14
Supplement: 12875_2019_953_MOESM4_ESM.pdf [file 12875_2019_953_MOESM4_ESM.pdf]

## Drug list

Drugs were patients chose not to implement their GPs`recommendation for change by order of frequency by indication group based on WHO- ATC coding (1).

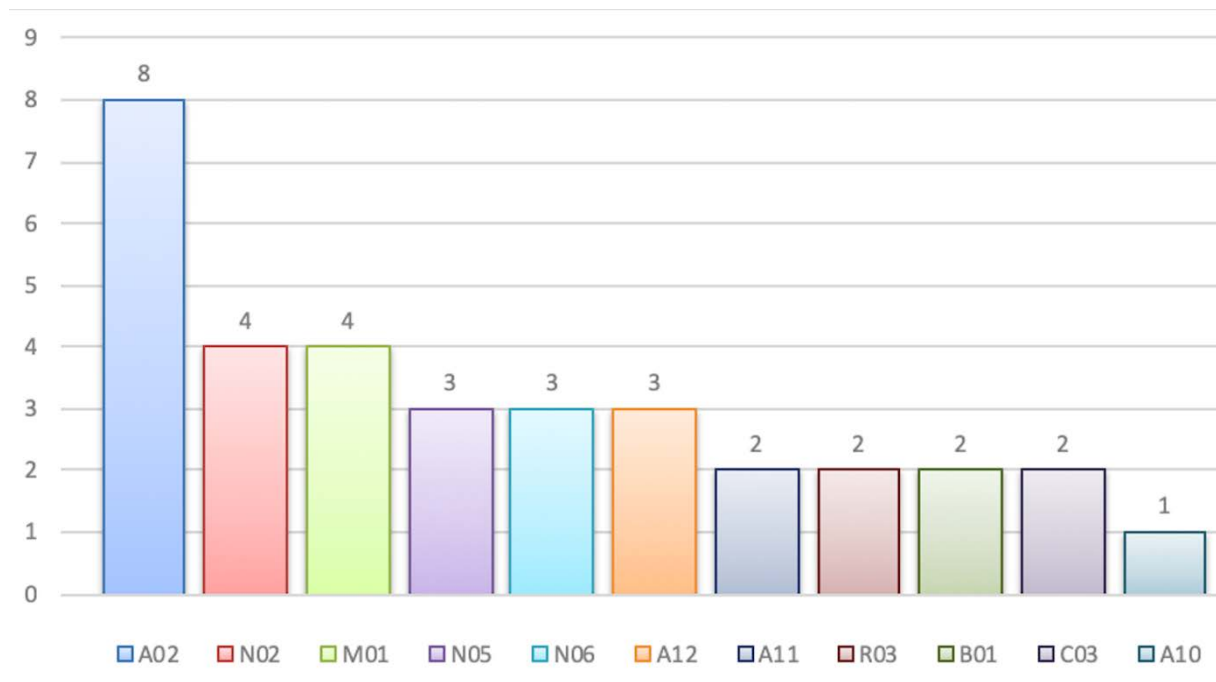

A02 **DRUGS FOR ACID RELATED DISORDERS (8)**

N02 **ANALGESICS (4)**

M01 **ANTIINFLAMMATORY AND ANTIRHEUMATIC PRODUCTS (4)**

N05 **PSYCHOLEPTICS (3)**

N06 **PSYCHOANALEPTICS (3)**

A12 **MINERAL SUPPLEMENTS (3)**

A11 **VITAMINS (2)**

R03 **DRUGS FOR OBSTRUCTIVE AIRWAY DISEASES (2)**

B01 **ANTITHROMBOTIC AGENTS (2)**

C03 **DIURETICS (2)**

A10 **DRUGS USED IN DIABETES (1)**

1. WHO ATC Coding. URL: <https://www.whocc.no/>, Accessed 14.01.2019
